# Supplementary material
Source: PubMed Central journal article supplement (PMC2950094)
Supplement: NIHMS224983-supplement-Supp1.pdf [file NIHMS224983-supplement-Supp1.pdf]

## Supplemental Material

### Supplemental Figure 1. Schematic representation of the injection cannulae placements

The location of the injector tips is represented by gray circles, and black triangles show the DMS and DLS, respectively for the following experiments: Intra-DMS and intra-DLS infusion of ifenprodil or PP2 in operant ethanol self-administration (**A**); Intra-DMS infusion of ifenprodil or PP2 did not alter operant sucrose self-administration (**B**); Intra-DMS infusion of ifenprodil or PP2 in extinction session (**C**); Intra-DMS infusion of ifenprodil or PP2 in reinstatement of ethanol seeking (**D**). Cannulae placements were performed according to (Paxinos and Watson, 2007).

### References

Paxinos G, Watson C (2007) The Rat Brain in stereotaxic coordinates, four Edition. San Diego: Academic Press.

# Supplemental Figure 1

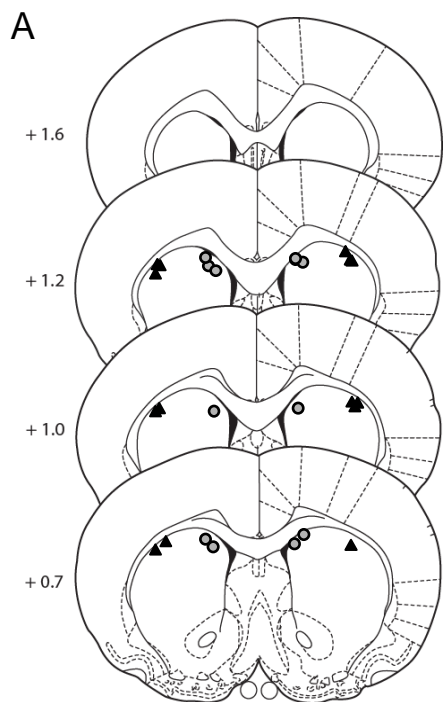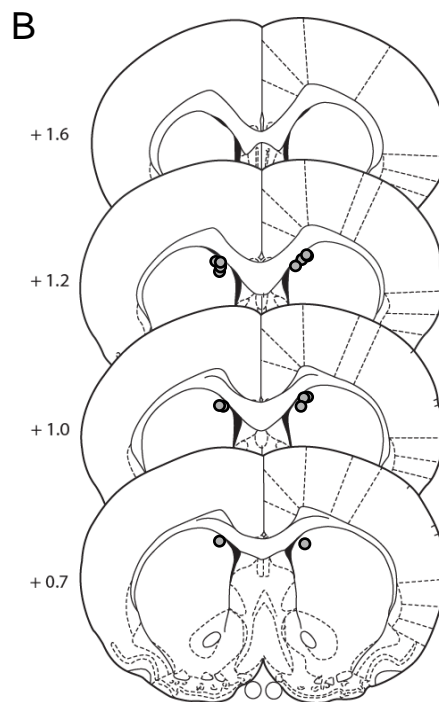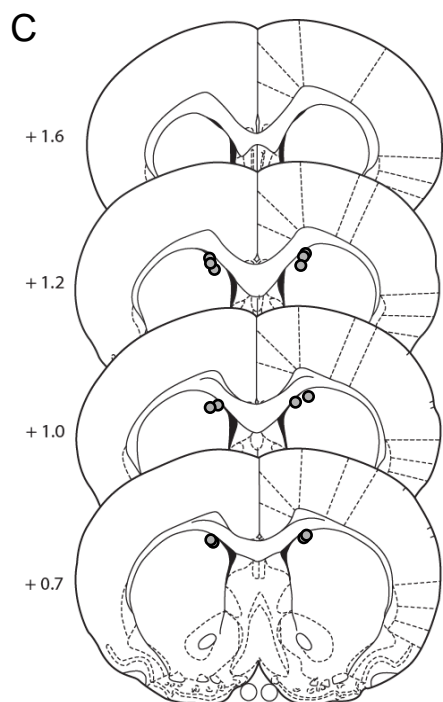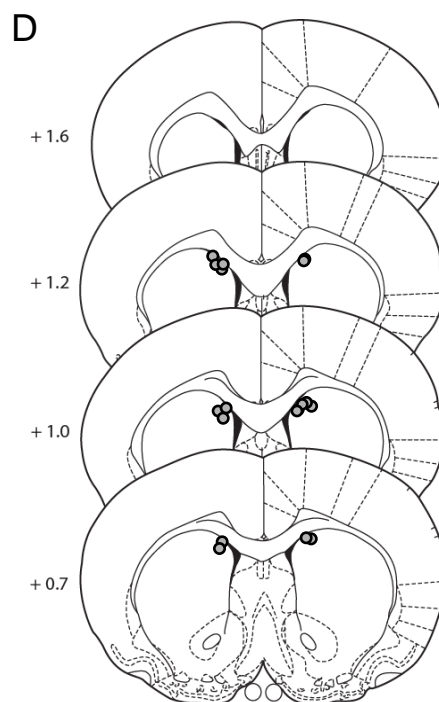

**Supplemental Table 1. Mean ethanol intake and preference  $\pm$  SEM of the last 2 weeks of an intermittent-access two-bottle-choice drinking paradigm.**

| Experiment                          | Ethanol intake (g/kg/24hrs) | Ethanol preference (%) |
|-------------------------------------|-----------------------------|------------------------|
| Electrophysiological measurements   | 5.67 $\pm$ 0.15             | 59 $\pm$ 4             |
| Biochemical measurements            | 4.88 $\pm$ 0.16             | 0.53 $\pm$ 0.01        |
| Operant ethanol self-administration | 6.18 $\pm$ 0.73             | 0.55 $\pm$ 0.07        |
| Extinction                          | 5.49 $\pm$ 0.88             | 0.52 $\pm$ 0.08        |
| Reinstatement                       | 5.81 $\pm$ 0.69             | 0.51 $\pm$ 0.06        |
